# Supplementary material for: 35/37Cl and 16/18O isotope resolved 195Pt NMR: unique spectroscopic ‘fingerprints’ for unambiguous speciation of [PtCln(H2O)6−n]4−n (n = 2–5) complexes in an acidic aqueous solution
Source: Royal Society of Chemistry journal article supplement (doi:10.1039/c2dt31201h), 2012-01-01
Supplement: c2dt31201h_3.docx [file c2dt31201h_3.docx]

| Species | Δitlδ195Pt/ppma /Hz | |
| --- | --- | --- |
| [PtCl6]2- | 0.171 | 22 |
| [PtCl5(H2O)]- | 0.194 | 25 |
| *cis-*[PtCl4(H2O)2] | 0.184 | 23.7 |
| *trans-*[PtCl4(H2O)2] | 0.156 | 20 |
| *fac-*[PtCl3(H2O)3]+ | 0.217 | 28 |
| *mer-*[PtCl3(H2O)3]+ | 0.185 | 23.8 |
| *cis-*[PtCl2(H2O)4]2+ | 0.223 | 28.7 |
| *trans-*[PtCl2(H2O)4]2+ | 0.144 | 18.6 |

a  Δitl195Pt is defined as the average difference between (195Pt) values of two adjacent 35/37Cl isotopologues of a given species, e.g. (*trans*-[Pt 35Cl2(H2O)4]2+ - *trans*-[Pt 35/37Cl2(H2O)4]2+) ~ -0.144 ppm.
