# Supplementary figures and images for: 35/37Cl and 16/18O isotope resolved 195Pt NMR: unique spectroscopic ‘fingerprints’ for unambiguous speciation of [PtCln(H2O)6−n]4−n (n = 2–5) complexes in an acidic aqueous solution
Source: Royal Society of Chemistry journal article supplement (doi:10.1039/c2dt31201h), 2012-01-01

Figure S1


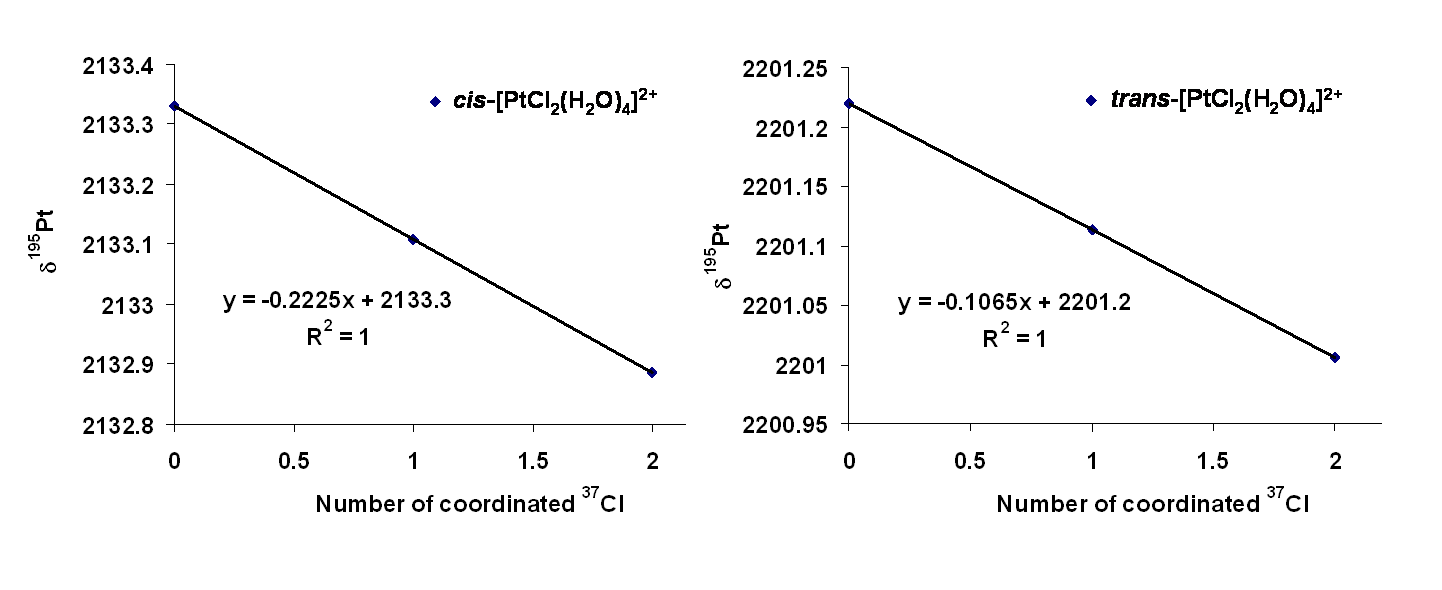


Figure S2


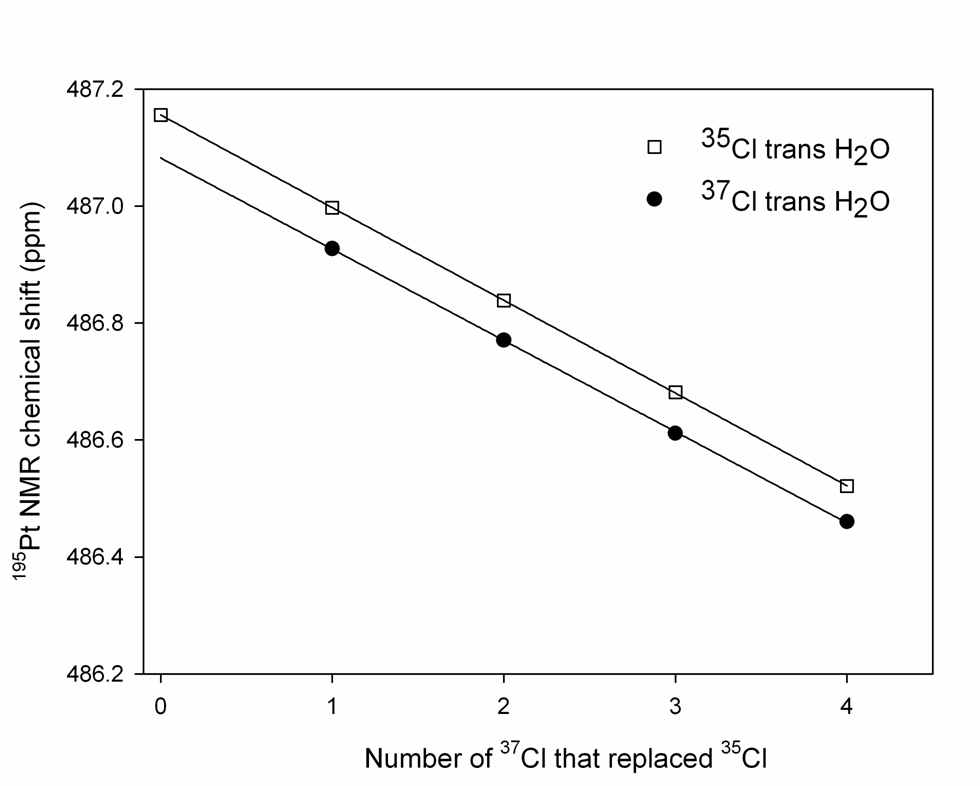

Supplement: c2dt31201h.docx [file c2dt31201h.docx]

Figure S3 (Koch et al)


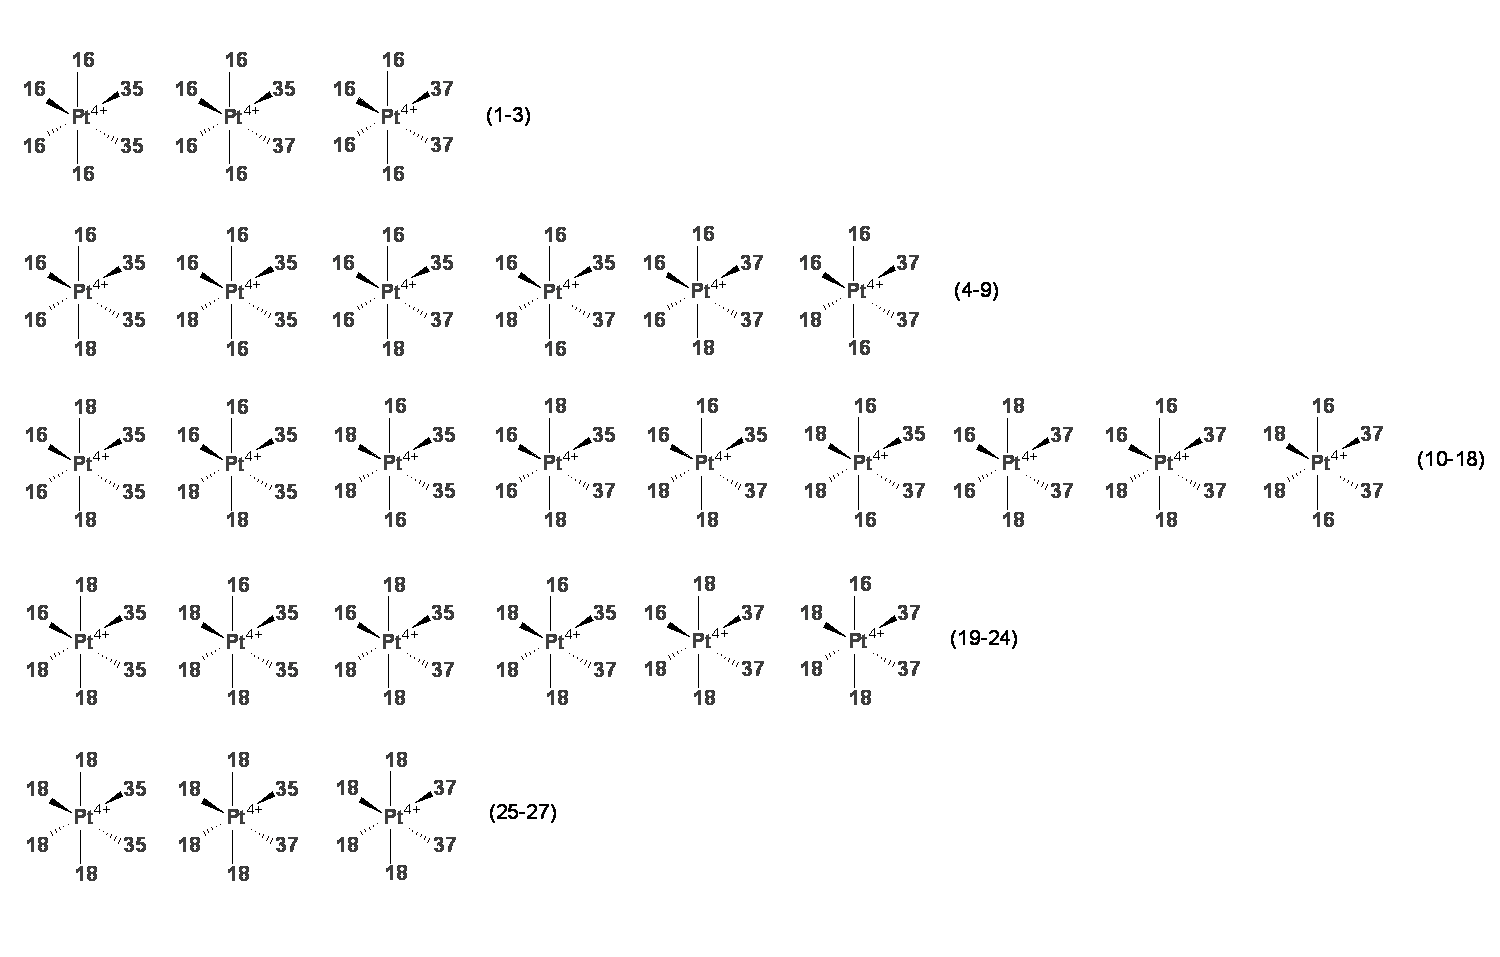

Supplement: c2dt31201h_2.docx [file c2dt31201h_2.docx]
